# Supplementary material for: Distinguishable Zn(ii) and Pb(ii) template effects on forming pendant-armed Schiff-base macrocyclic complexes including a remarkable Pb(ii)–π macrocyclic complex
Source: Royal Society of Chemistry journal article supplement (doi:10.1039/c4dt01927j), 2014-01-01
Supplement: c4dt01927j1.pdf [file c4dt01927j1.pdf]

# Distinguishable Zn(II) and Pb(II) template effects on forming pendant-armed Schiff-base macrocyclic complexes including a unprecedented Pb(II)- $\pi$ macrocyclic complex

Kun Zhang, Jiao Geng, Chao Jin and Wei Huang

## Supporting Information-Table of Contents

### Table

|                                                                                             |    |
|---------------------------------------------------------------------------------------------|----|
| Table SI1. Selected bond distances ( $\text{\AA}$ ) and angles ( $^\circ$ ) in <b>1-4</b> . | S2 |
| Table SI2. Hydrogen bonding parameters ( $\text{\AA}$ , $^\circ$ ) in <b>1-4</b> .....      | S5 |

### Figures

|                                                                                                                    |    |
|--------------------------------------------------------------------------------------------------------------------|----|
| Figure SI1. FT-IR spectrum of Zn(II) complex <b>1a</b> .....                                                       | S6 |
| Figure SI2. FT-IR spectrum of Zn(II) complex <b>1b</b> .....                                                       | S6 |
| Figure SI3. FT-IR spectrum of Pb(II) complex <b>2</b> .....                                                        | S7 |
| Figure SI4. FT-IR spectrum of Pb(II) complex <b>3</b> .....                                                        | S7 |
| Figure SI5. FT-IR spectrum of Zn(II) complex <b>4</b> .....                                                        | S8 |
| Figure SI6. $^1\text{H}$ NMR spectrum of Pb(II) complex <b>2</b> .....                                             | S8 |
| Figure SI7. $^1\text{H}$ NMR spectrum of Pb(II) complex <b>3</b> .....                                             | S9 |
| Figure SI8. Perspective view of the packing structure of complex <b>1a</b> · $\text{C}_2\text{H}_5\text{OH}$ ..... | S9 |
| Figure SI9. Perspective view of the packing structure of complex                                                   |    |

|                                                                                  |     |
|----------------------------------------------------------------------------------|-----|
| <b>1b</b> ·CH <sub>3</sub> OH.....                                               | S10 |
| Figure SI10. Perspective view of the packing structure of complex <b>2</b> ..... | S10 |
| Figure SI11. Perspective view of the packing structure of complex <b>3</b> ..... | S11 |

## Tables

**Table SI1** Selected bond distances (Å) and angles (°) in **1–4**.

| Bond distances                              |          | Bond angles |          |
|---------------------------------------------|----------|-------------|----------|
| <b>1a</b> ·C <sub>2</sub> H <sub>5</sub> OH |          |             |          |
| Zn1–O1                                      | 1.953(3) | O1–Zn1–O2   | 97.6(1)  |
| Zn1–O2                                      | 1.981(3) | O1–Zn1–O7   | 104.8(1) |
| Zn1–O7                                      | 2.178(3) | O1–Zn1–N1   | 90.0(1)  |
| Zn1–N1                                      | 2.088(3) | O1–Zn1–N2   | 125.6(1) |
| Zn1–N2                                      | 2.046(3) | O2–Zn1–O7   | 90.7(1)  |
| Zn2–O3                                      | 1.970(3) | O2–Zn1–N1   | 171.4(1) |
| Zn2–O4                                      | 2.008(3) | O2–Zn1–N2   | 92.7(1)  |
| Zn2–O7                                      | 2.093(3) | O7–Zn1–N1   | 83.4(1)  |
| Zn2–N3                                      | 2.121(3) | O7–Zn1–N2   | 128.5(1) |
| Zn2–N4                                      | 2.047(4) | N1–Zn1–N2   | 86.1(1)  |
|                                             |          | O3–Zn2–O4   | 92.5(1)  |
|                                             |          | O3–Zn2–O7   | 110.2(1) |
|                                             |          | O3–Zn2–N3   | 87.3(1)  |
|                                             |          | O3–Zn2–N4   | 126.4(1) |
|                                             |          | O4–Zn2–O7   | 87.8(1)  |
|                                             |          | O4–Zn2–N3   | 177.0(1) |
|                                             |          | O4–Zn2–N4   | 91.1(1)  |
|                                             |          | O7–Zn2–N3   | 95.2(1)  |
|                                             |          | O7–Zn2–N4   | 123.4(1) |
|                                             |          | N3–Zn2–N4   | 86.6(2)  |

|                            |           |            |          |
|----------------------------|-----------|------------|----------|
|                            |           | Zn1–O7–Zn2 | 126.2(1) |
|                            |           | Zn1–O7–N7  | 114.0(2) |
|                            |           | Zn2–O7–N7  | 112.5(2) |
| <hr/>                      |           |            |          |
| <b>1b·CH<sub>3</sub>OH</b> |           |            |          |
| Zn1–O1                     | 1.979(5)  | O1–Zn1–O4  | 97.2(2)  |
| Zn1–O4                     | 1.982(4)  | O1–Zn1–O5  | 101.6(2) |
| Zn1–O5                     | 2.125(4)  | O1–Zn1–N5  | 143.1(2) |
| Zn1–N5                     | 2.070(6)  | O1–Zn1–N6  | 86.7(2)  |
| Zn1–N6                     | 2.113(6)  | O4–Zn1–O5  | 92.1(2)  |
| Zn2–O2                     | 1.965(5)  | O4–Zn1–N5  | 90.5(2)  |
| Zn2–O3                     | 2.012(4)  | O4–Zn1–N6  | 174.0(2) |
| Zn2–O5                     | 2.160(5)  | O5–Zn1–N5  | 115.2(2) |
| Zn2–N2                     | 2.080(6)  | O5–Zn1–N6  | 93.8(2)  |
| Zn2–N3                     | 2.052(6)  | N5–Zn1–N6  | 87.9(2)  |
|                            |           | O2–Zn2–O3  | 95.5(2)  |
|                            |           | O2–Zn2–O5  | 113.9(2) |
|                            |           | O2–Zn2–N2  | 90.1(2)  |
|                            |           | O2–Zn2–N3  | 120.9(2) |
|                            |           | O3–Zn2–O5  | 88.0(2)  |
|                            |           | O3–Zn2–N2  | 173.4(2) |
|                            |           | O3–Zn2–N3  | 91.5(2)  |
|                            |           | O5–Zn2–N2  | 86.6(2)  |
|                            |           | O5–Zn2–N3  | 125.0(2) |
|                            |           | N2–Zn2–N3  | 88.6(3)  |
|                            |           | Zn1–O5–Zn2 | 124.5(2) |
|                            |           | Zn1–O5–N7  | 116.5(4) |
|                            |           | Zn2–O5–N7  | 110.7(4) |
| <hr/>                      |           |            |          |
| <b>2</b>                   |           |            |          |
| Pb1–O1                     | 2.283(4)  | O1–Pb1–O2  | 75.6(1)  |
| Pb1–O2                     | 2.325(4)  | O1–Pb1–N2  | 113.4(2) |
| Pb1–N2                     | 2.519(5)  | O1–Pb1–N3  | 74.1(2)  |
| Pb1–N3                     | 2.462(5)  | O2–Pb1–N2  | 72.8(2)  |
| Pb1–C26                    | 3.468(10) | O2–Pb1–N3  | 111.6(2) |
| Pb1–C27                    | 3.578(8)  | N2–Pb1–N3  | 66.0(2)  |
| Pb1–C25                    | 3.708(10) |            |          |
| Pb1–C22                    | 3.946(7)  |            |          |
| Pb1–C24                    | 3.991(10) |            |          |

|                     |           |                                      |          |
|---------------------|-----------|--------------------------------------|----------|
| Pb1–C23             | 4.102(8)  |                                      |          |
| <b>3</b>            |           |                                      |          |
| Pb1–O1              | 2.330(8)  | O1–Pb1–N1                            | 72.9(3)  |
| Pb1–N1              | 2.503(10) | O1–Pb1–O1 <sup>c</sup>               | 74.8(3)  |
| Pb1–O1 <sup>c</sup> | 2.330(8)  | O1–Pb1–N1 <sup>c</sup>               | 112.1(3) |
| Pb1–N1 <sup>c</sup> | 2.503(10) | O2 <sup>c</sup> –Pb1–N1              | 112.1(3) |
| Pb1–O2 <sup>c</sup> | 3.291(14) | N1–Pb1–N1 <sup>c</sup>               | 66.9(3)  |
|                     |           | O2 <sup>c</sup> –Pb1–N1 <sup>c</sup> | 72.9(3)  |
| <b>4</b>            |           |                                      |          |
| Zn1–O1              | 2.112(5)  | O1–Zn1–O2                            | 87.4(2)  |
| Zn1–O2              | 2.118(6)  | O1–Zn1–O3                            | 83.0(2)  |
| Zn1–O3              | 2.319(5)  | O1–Zn1–O1 <sup>a</sup>               | 81.3(2)  |
| Zn1–O1 <sup>a</sup> | 2.108(5)  | O1–Zn1–O4 <sup>a</sup>               | 84.7(2)  |
| Zn1–O4 <sup>a</sup> | 2.044(5)  | O1–Zn1–N1 <sup>a</sup>               | 171.1(2) |
| Zn2–N1 <sup>a</sup> | 2.138(5)  | O2–Zn1–O3                            | 89.8(2)  |
|                     |           | O1 <sup>a</sup> –Zn1–O2              | 164.9(2) |
|                     |           | O2–Zn1–O4 <sup>a</sup>               | 92.9(2)  |
|                     |           | O2–Zn1–N1 <sup>a</sup>               | 101.5(2) |
|                     |           | O1 <sup>a</sup> –Zn1–O3              | 79.0(2)  |
|                     |           | O3–Zn1–O4 <sup>a</sup>               | 167.2(2) |
|                     |           | O3–Zn1–N1 <sup>a</sup>               | 97.0(2)  |
|                     |           | O1 <sup>a</sup> –Zn1–O4 <sup>a</sup> | 96.0(2)  |
|                     |           | O1 <sup>a</sup> –Zn1–N1 <sup>a</sup> | 90.0(2)  |
|                     |           | O4 <sup>a</sup> –Zn1–N1 <sup>a</sup> | 94.8(2)  |
|                     |           | Zn1–O1–Zn1 <sup>a</sup>              | 98.7(2)  |

Symmetry codes: <sup>a</sup>, 2–x, –y, 1–z; <sup>c</sup>, x, –y, z.

**Table SI2** Hydrogen bonding parameters (Å, °) in **1–4**.

| D–H···A                                     | D–H  | H···A | D···A     | ∠DHA | Symmetry code |
|---------------------------------------------|------|-------|-----------|------|---------------|
| <b>1a</b> ·C <sub>2</sub> H <sub>5</sub> OH |      |       |           |      |               |
| O1–H1···N5                                  | 0.93 | 2.19  | 2.804(4)  | 122  |               |
| O3–H3A···N5                                 | 0.93 | 1.95  | 2.682(4)  | 134  |               |
| O5–H5A···O12                                | 0.82 | 1.97  | 2.696(8)  | 147  | -1+x, -1+y, z |
| O6–H6···O10                                 | 0.82 | 2.03  | 2.764(6)  | 150  | 2-x, 1-y, -z  |
| <b>1b</b> ·CH <sub>3</sub> OH               |      |       |           |      |               |
| O2–H2A···O1                                 | 0.97 | 2.50  | 3.141(6)  | 123  |               |
| O2–H2A···N1                                 | 0.97 | 1.95  | 2.767(7)  | 140  |               |
| O4–H4A···N4                                 | 0.97 | 2.03  | 2.807(7)  | 135  |               |
| <b>3</b>                                    |      |       |           |      |               |
| O1–H1A···N2                                 | 0.85 | 2.05  | 2.797(14) | 146  |               |
| <b>4</b>                                    |      |       |           |      |               |
| O3–H3A···O4                                 | 0.97 | 1.81  | 2.754(7)  | 164  |               |

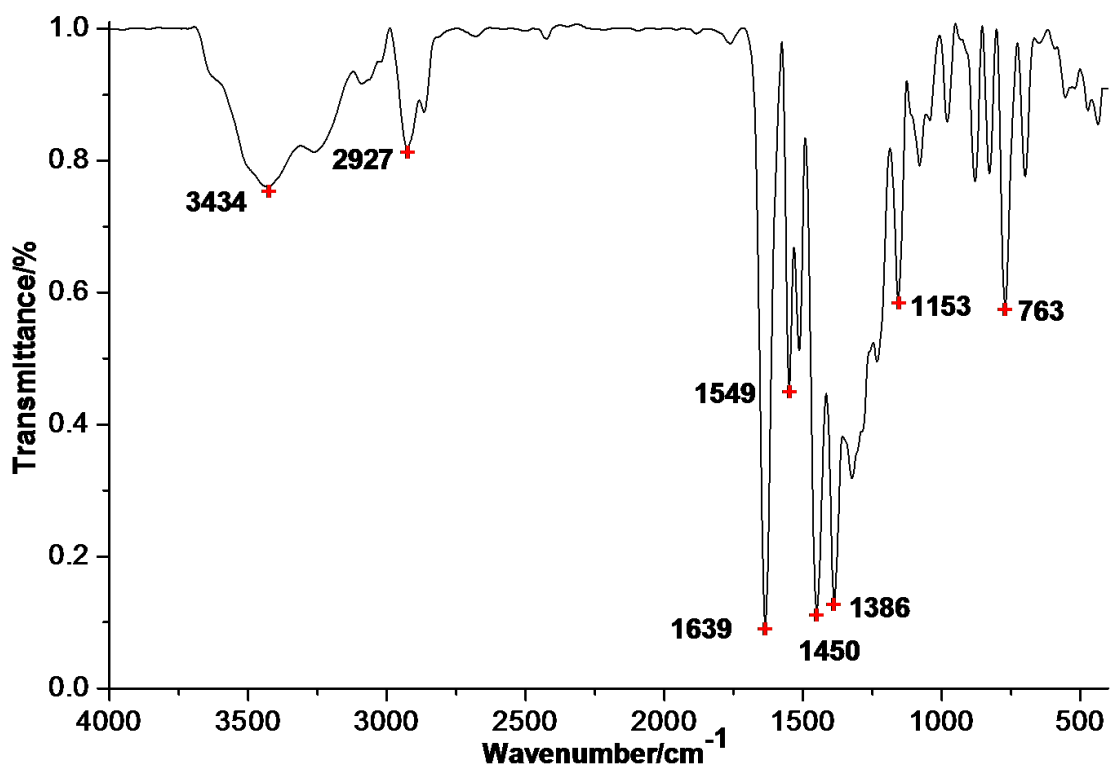

Figure SI1. FT-IR spectrum of Zn(II) complex 1a.

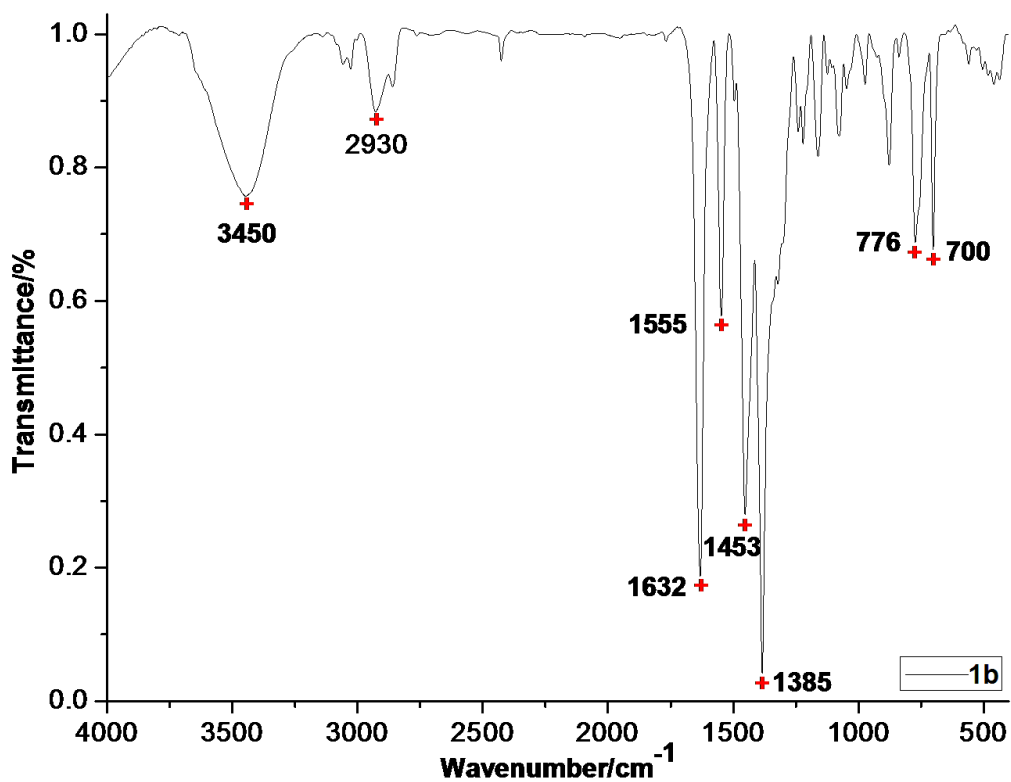

Figure SI2. FT-IR spectrum of Zn(II) complex 1b.

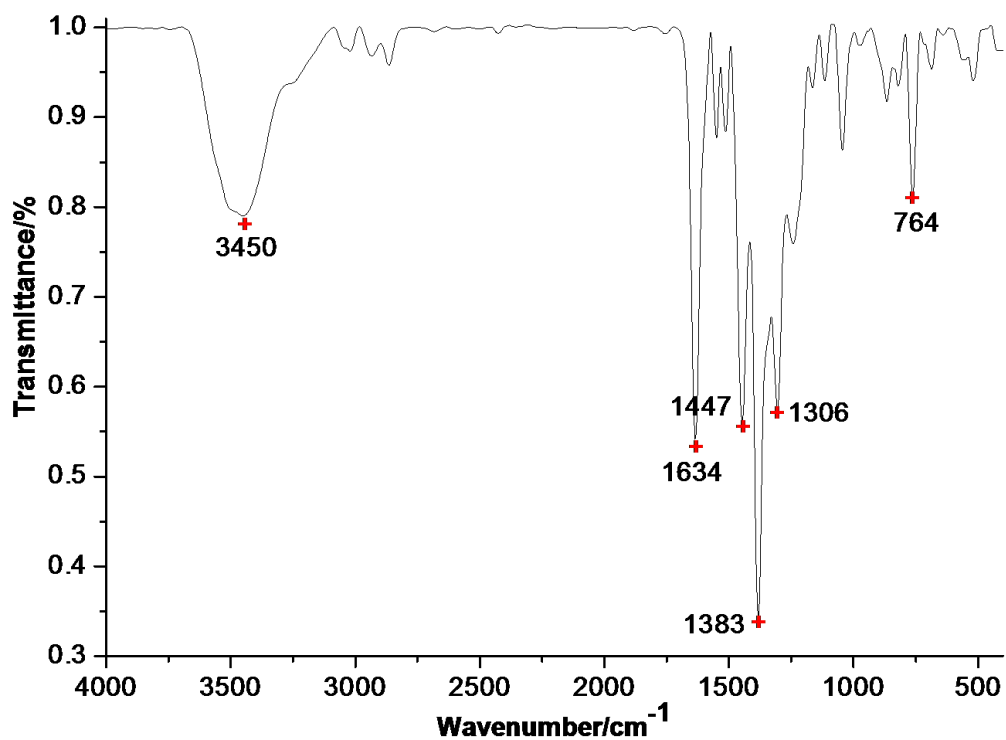

Figure SI3. FT-IR spectrum of Pb(II) complex 2.

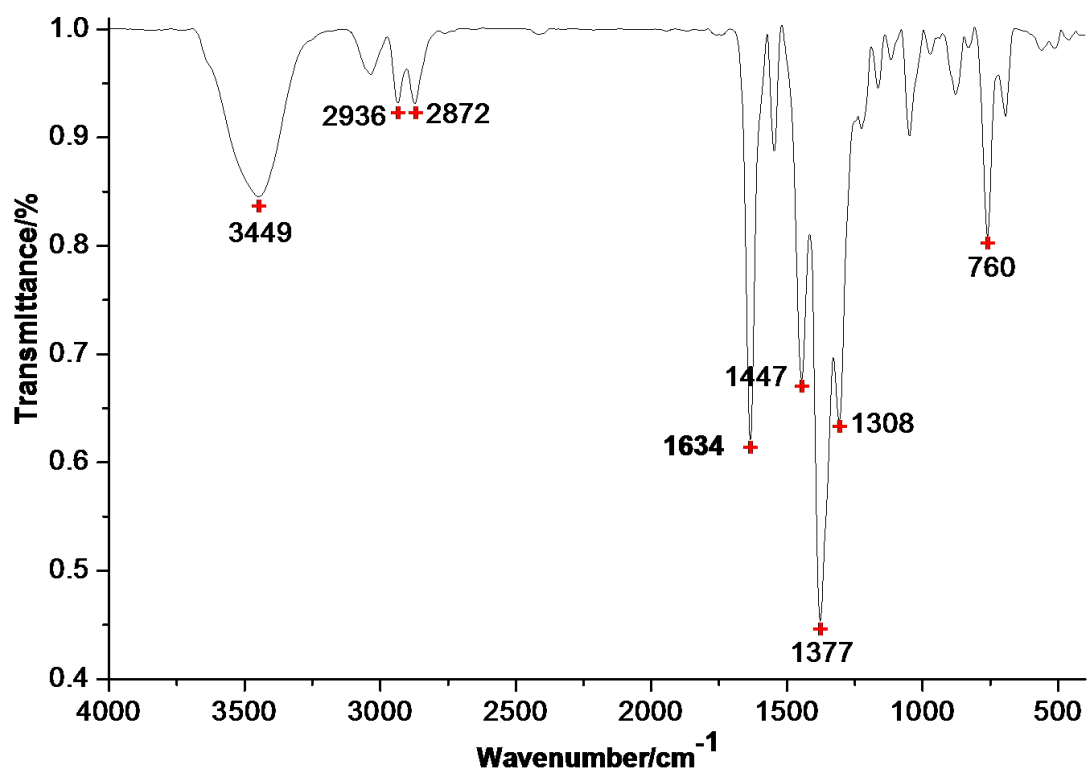

Figure SI4. FT-IR spectrum of Pb(II) complex 3.

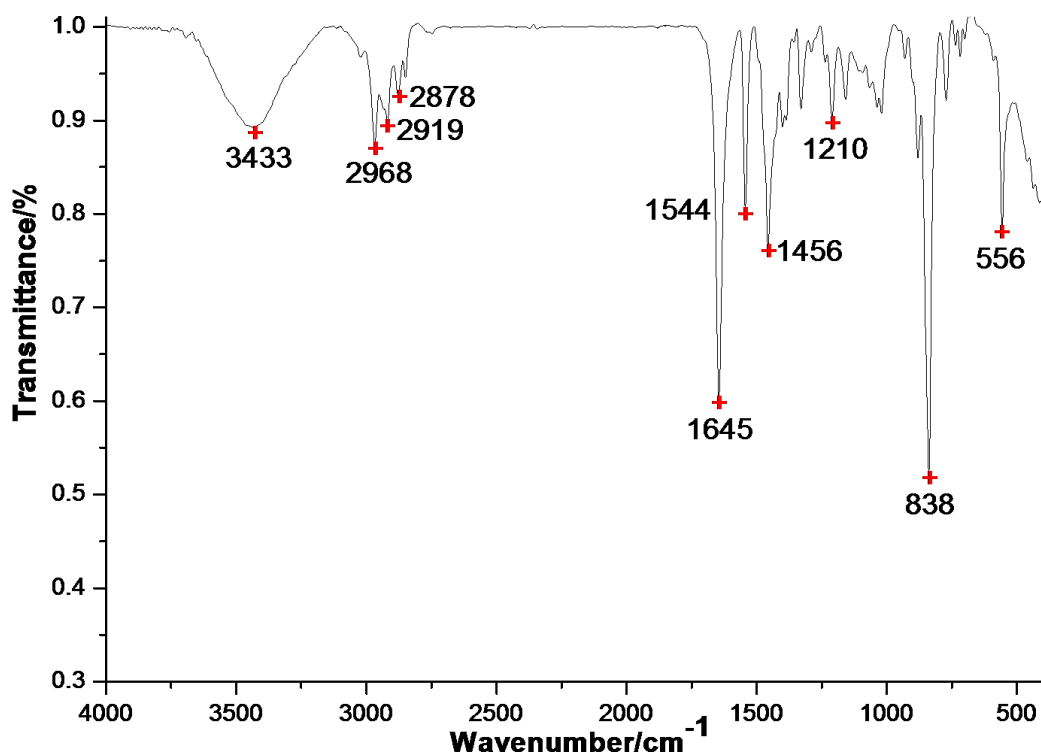

Figure SI5. FT-IR spectrum of Zn(II) complex 4.

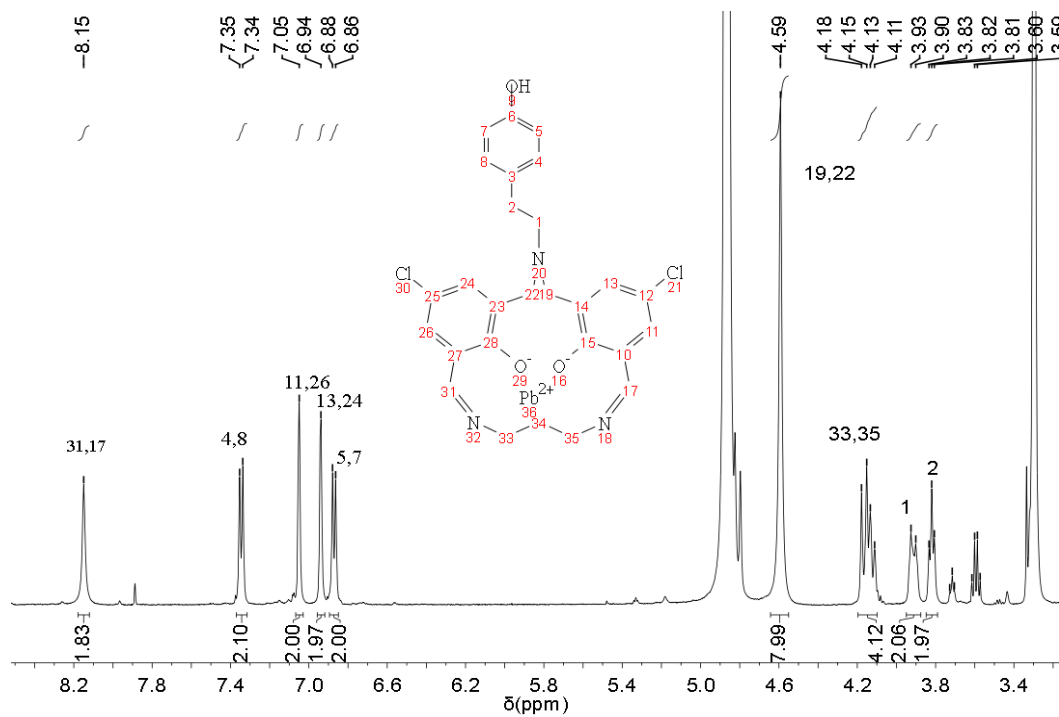

Figure SI6. <sup>1</sup>H NMR spectrum of Pb(II) complex 2 in CD<sub>3</sub>OD.



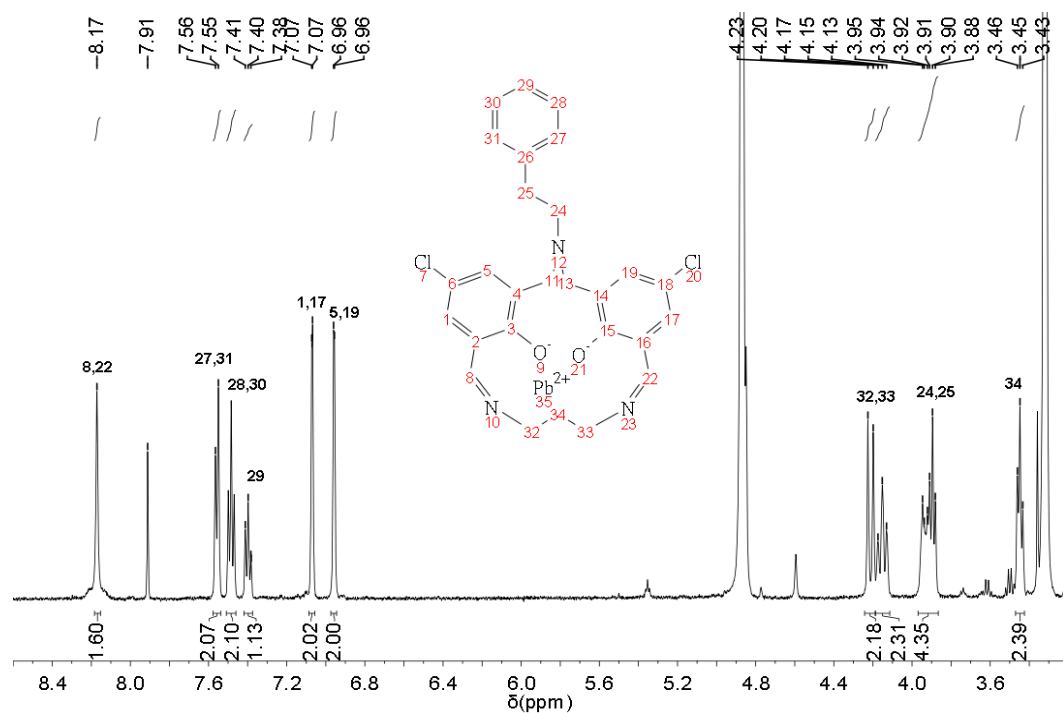

**Figure SI7.**  $^1\text{H}$  NMR spectrum of Pb(II) complex **3** in  $\text{CD}_3\text{OD}$ .

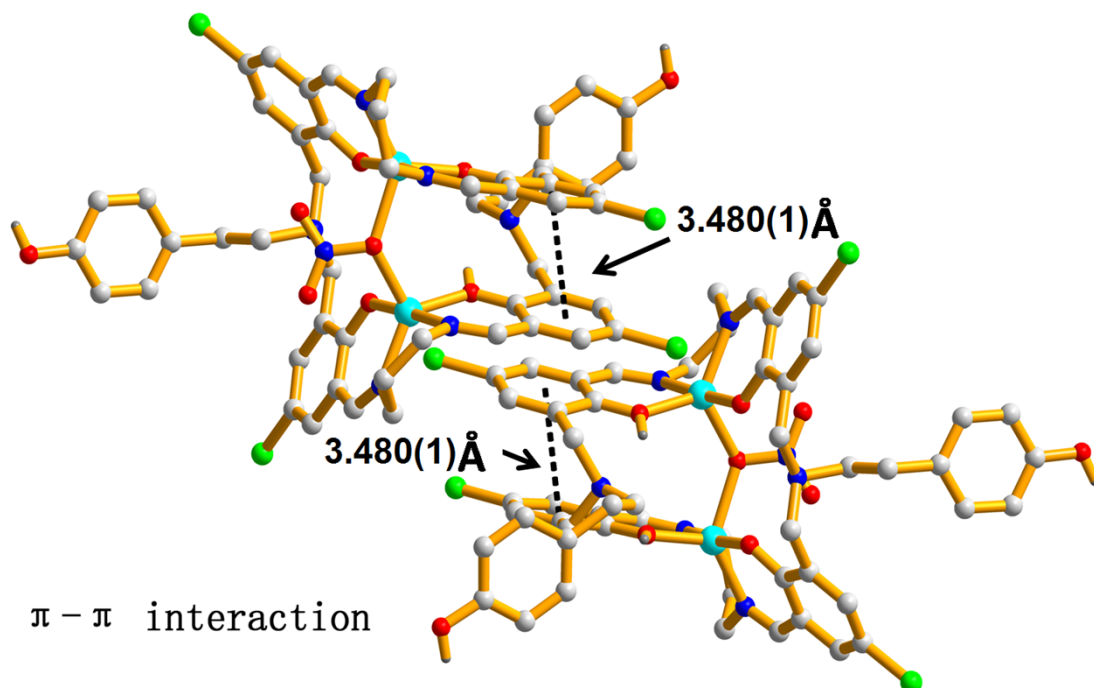

**Figure SI8** Perspective view of the packing structure of compound **1a**· $\text{C}_2\text{H}_5\text{OH}$  showing typical  $\pi - \pi$  stacking interactions.

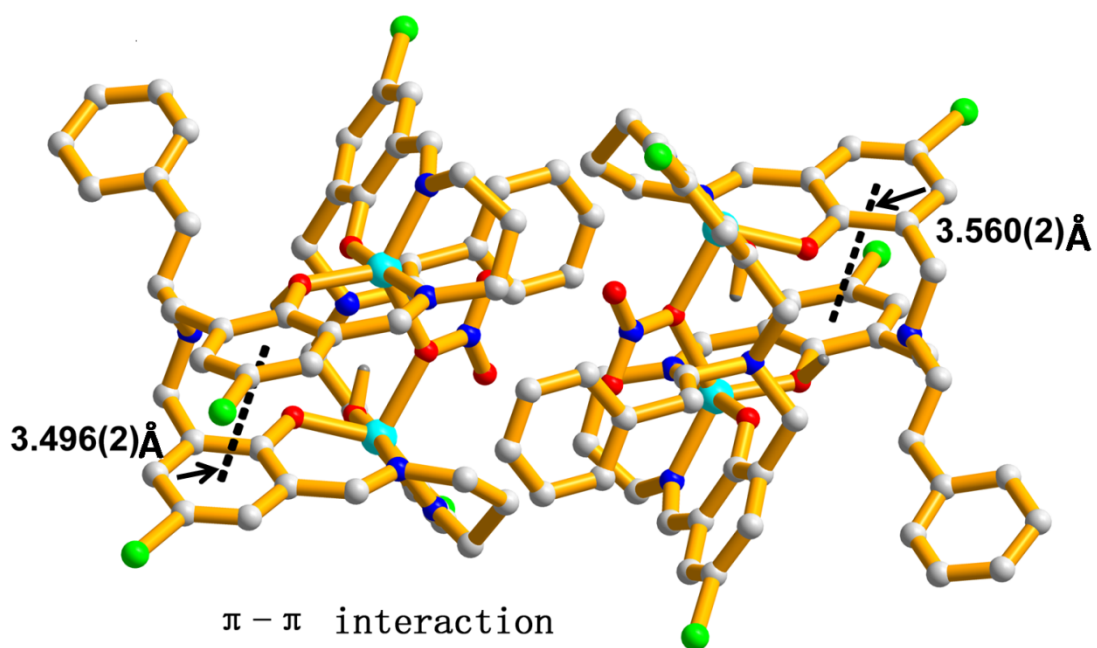

**Figure SI9** Perspective view of the packing structure of compound **1b**·CH<sub>3</sub>OH showing typical  $\pi$ - $\pi$  stacking interactions.

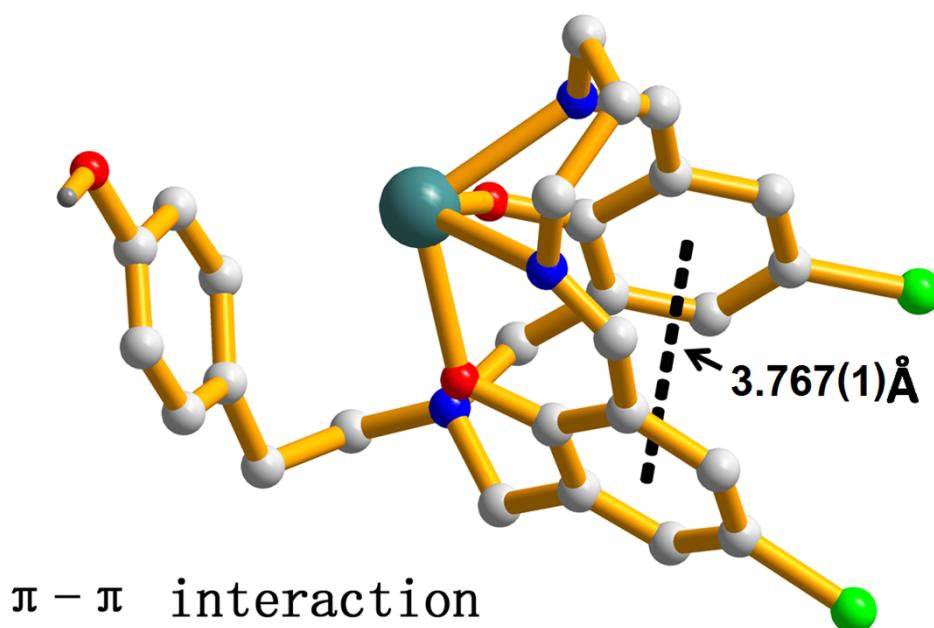

**Figure SI10** Perspective view of the packing structure of compound **2** showing typical  $\pi$ - $\pi$  stacking interactions.

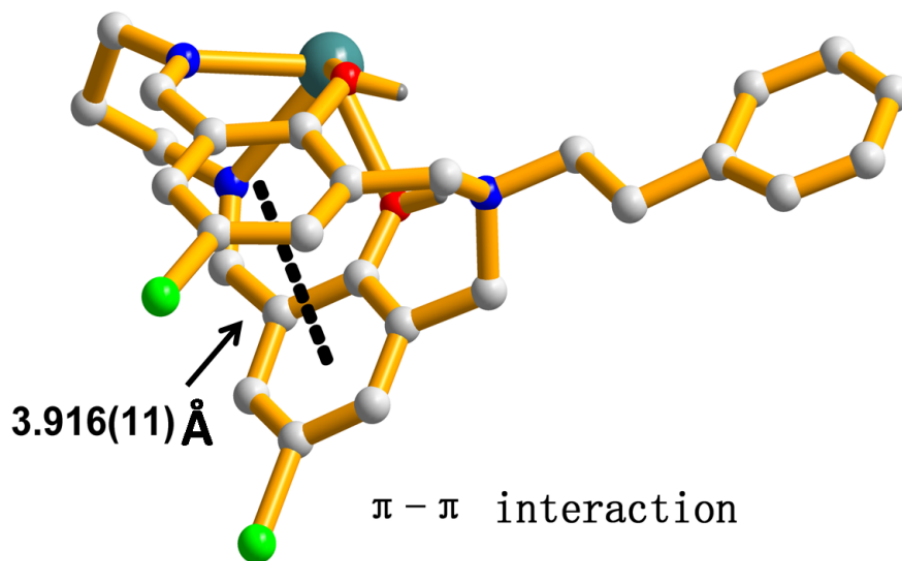

**Figure SI11** Perspective view of the packing structure of compound **3** showing typical  $\pi$ - $\pi$  stacking interactions.
